# Supplementary material
Source: publisher figshare collection journal article supplement (https://acs.figshare.com/ndownloader/files/13110194)
Supplement: Supplementary file 1 [file 13110194]

# SUPPORTING INFORMATION

The supporting information consists of 13 pages, including cover page, containing 4 figures and 6 tables.

## Renewable Rubber and Jet Fuel from Biomass: Evaluation of Greenhouse Gas Emissions and Land Use Tradeoffs in Energy and Material Markets

Bahar Riazi<sup>1</sup>, Mukund Karanjikar<sup>2</sup>, Sabrina Spatari<sup>1</sup>

**1** Drexel University, Department of Civil, Architectural, and Environmental Engineering, 3141 Chestnut Street, Philadelphia, PA, USA

**2** Technology Holding LLC, Salt Lake City, UT, USA

## SUPPORTING FIGURES

*Fermentation experimental details:* Total MBE yield was 10.02g/L at an efficiency of 65% of the theoretical maximum yield. The temperature of culture was set to 37 °C. Agitation and airflow rates were chosen to simulate the best-case scenario in shake flask testing. The fermenter controller was set to maintain a pH of 7.0 through the addition of 25% ammonium hydroxide as is often optimal for *E. coli* expression systems. Any excess foam was controlled via the addition of 1% antifoam 204. Feeding was achieved through constant addition of hydrolysate at a rate of approximately 1g/L/hr, but was adjusted as necessary to maintain a glucose concentration between 1g/L and 10g/L. Glucose concentration was periodically measured via glucometer during the fermentation and HPLC after the completion of the fermentation. A titer of 10.02g/L of MBE was measured (Figure S1).

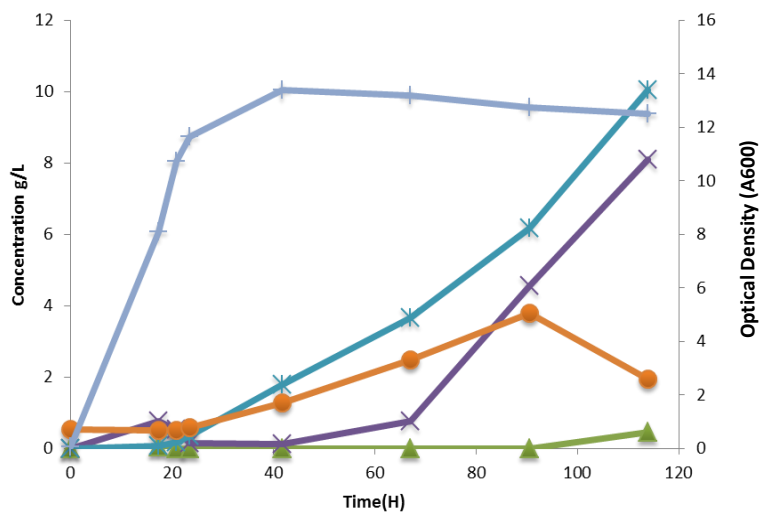

**Figure S1.** Fermentation in minimal media.

*Separation step modeling:* The model parameters were subsequently tweaked to achieve a bottoms stream purity of 95% MBE by mass while reducing the reboiler duty and staying within a reasonable number of theoretical stages. The distillation tower was first optimized for operation at atmospheric pressure before being adjusted to reduce reboiler duty at 0.5 bar. The simulation was then modified to incorporate a recycle stream; the distillate from the tower would be recycled to the extractor (“DECANT” in Figure S2), so that benzene could be reused. A design spec constraint was added to the model, specifying that the fresh benzene stream (“BENZENE” stream in Figure S2) would only add enough benzene to the extractor for the feed to the distillation column to contain equimolar amounts of benzene and MBE.

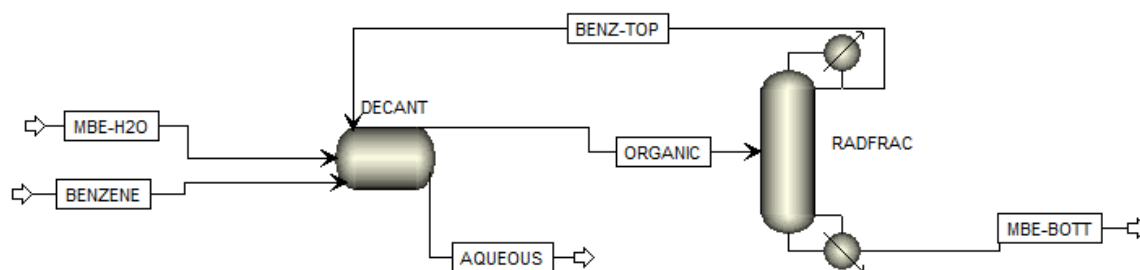

**Figure S2.** Process flow diagram of separation modeled in Aspen Plus<sup>1</sup>.

*Methyl butenol dehydration to produce isoprene:* A number of experiments were performed with industrial Amberlyst® catalysts. The temperature was varied from 70 °C to 150 °C, LHSV was varied between 6 and 18 per hour. A total of 1 g of catalyst was loaded in a tubular reactor heated by an ATS furnace with PID controller. The experiments were performed for 6 runs each. Figure S3 shows the results of single pass conversion at LHSV of 12 per hour. It can be observed that, conversion is maximum at 110 °C, which is below the boiling point of methyl butenol. Thus, it was concluded that the dehydration reaction is liquid phase. The formed isoprene was simply decanted from unreacted methyl butenol and formed water. The total collected isoprene was measured to estimate total conversion.

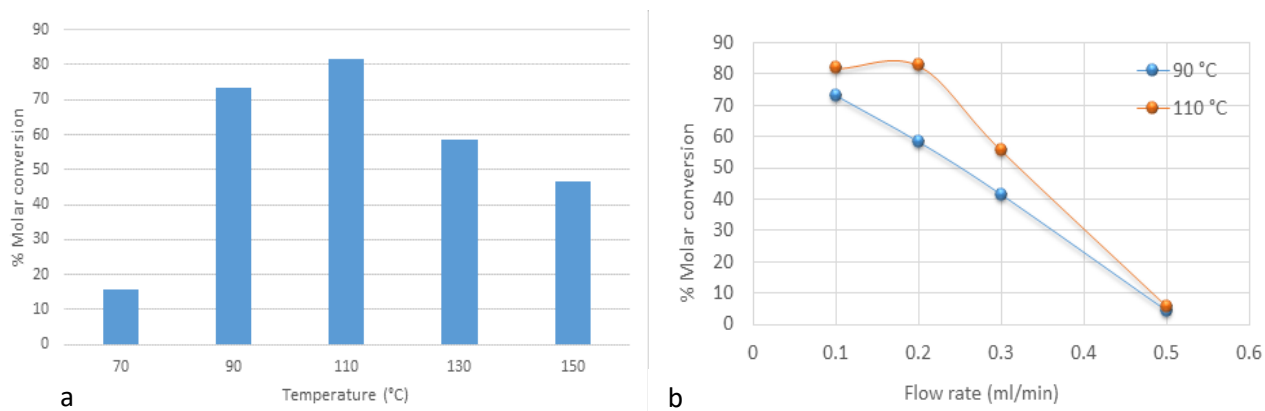

**Figure S3.** Methyl butenol conversion to isoprene as a function of temperature (a) and flow rates (b).

*Sensitivity of select model parameters on life cycle GWP:* The sensitivity of select parameters on life cycle GWP for corn stover-based polyisoprene was tested using upper and lower bounds documented in Table 1. Results of this sensitivity analysis are presented in a tornado plot (Figure S4).

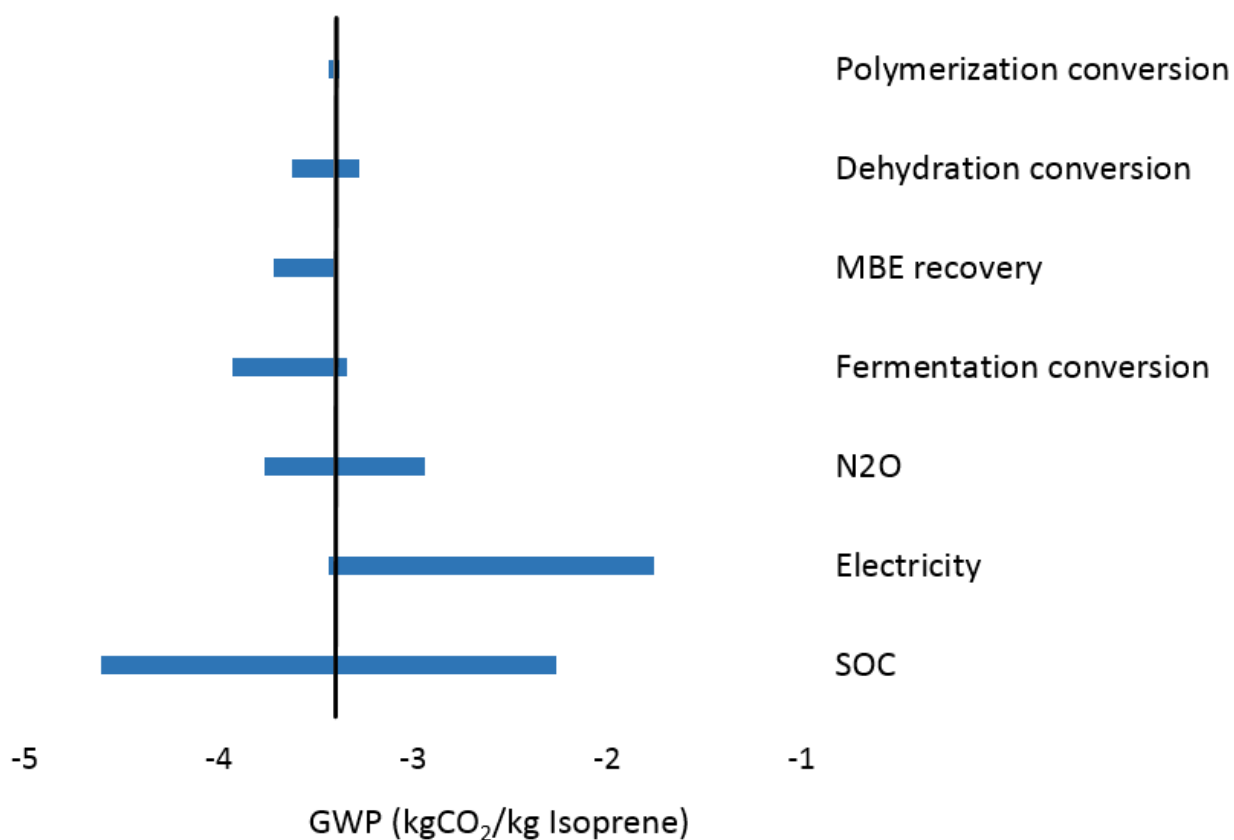

**Figure S4.** Tornado plot showing the sensitivity of select model parameters on life cycle GWP of corn stover-based polyisoprene.

## SUPPORTING TABLES

Three nominally optimized cases are presented in Table S1, showing that the recycle scheme not only allows significant reuse of benzene, it also allows near-complete recovery of the MBE product. The aqueous (wastewater) stream from the extractor consistently contains a negligible amount of MBE and a small amount of benzene (also specified in Table S1).

**Table S1.** Distillation column simulation cases studied: relevant parameters and results.

| <b>Case:</b>                                      | <b>1 bar</b> | <b>0.5 bar</b> | <b>0.5 bar with<br/>recycle</b> |
|---------------------------------------------------|--------------|----------------|---------------------------------|
| <b>Stage (including condenser and reboiler)</b>   | 14           | 14             | 14                              |
| <b>Feed stage</b>                                 | 5            | 3              | 6                               |
| <b>Boilup ratio<br/>(mol/mol)</b>                 | 4.5          | 3.8            | 3.8                             |
| <b>Reflux ratio<br/>(mol/mol)</b>                 | 2            | 2              | 2                               |
| <b>Fresh benzene<br/>(kg / kg MBE fed)</b>        | 0.9          | 0.9            | 0.04                            |
| <b>Bottoms MBE purity<br/>(wt/wt)</b>             | 94.7%        | 92.1%          | 96.4%                           |
| <b>Bottoms MBE recovery</b>                       | 82%          | 84%            | 100%                            |
| <b>Condenser duty<br/>(kJ / kg MBE recovered)</b> | -1592        | -1511          | -1533                           |
| <b>Reboiler duty<br/>(kJ / kg MBE recovered)</b>  | 1899         | 1711           | 1636                            |
| <b>Wastewater benzene<br/>concentration (ppm)</b> | 2.3          | 2.3            | 12.2                            |

**Table S2.** Energy requirements for conversion of fermentable sugars in biomass to polyisoprene

|                                         |         |                            |
|-----------------------------------------|---------|----------------------------|
| <b>Fermentation heating</b>             | 711.3   | kJ/kg of MBE produced      |
| <b>Separation cooling</b>               | -1533.4 | kJ/kg of product recovered |
| <b>Separation heating</b>               | 1636.4  | kJ/kg of product recovered |
| <b>Dehydration preheating</b>           | 31.6    | kJ/kg of MBE fed           |
| <b>Dehydration reactor duty</b>         | 1.5     | kJ/kg of MBE fed           |
| <b>Polymerization cooling</b>           | 36      | kJ/kg isoprene             |
| <b>Polymerization activation energy</b> | 202.7   | kJ/kg isoprene             |
| <b>Dimerization energy</b>              | 246.2   | kJ/kg jet fuel             |

**Table S3.** Contribution of different life cycle components on total GWP of polyisoprene from corn stover and forest residue

| <b>Life cycle components</b>                 | <b>GWP for polyisoprene from corn stover</b><br>(kgCO <sub>2</sub> /kg isoprene) | <b>GWP for polyisoprene from forest residue</b><br>(kgCO <sub>2</sub> /kg isoprene) | <b>Model source and assumptions</b>                                                                                                                                                       |
|----------------------------------------------|----------------------------------------------------------------------------------|-------------------------------------------------------------------------------------|-------------------------------------------------------------------------------------------------------------------------------------------------------------------------------------------|
| <b>Harvest/ field operations</b>             | 0.6                                                                              | 0.2                                                                                 | Using data from Pourhashem et al. <sup>2</sup> and Keedy et al. <sup>3</sup> for corn stover and forest residue based scenarios respectively as inputs for our SimaPro <sup>4</sup> model |
| <b>Nutrient replacement</b>                  | 0.2                                                                              | -                                                                                   | Based on DayCent model <sup>5</sup> results from Pourhashem et al. <sup>2</sup>                                                                                                           |
| <b>Total soil N<sub>2</sub>O emission</b>    | 0.3                                                                              | -                                                                                   | Based on DayCent model <sup>5</sup> results from Pourhashem et al. <sup>2</sup>                                                                                                           |
| <b>Change in soil carbon</b>                 | 1.2                                                                              | -                                                                                   | Based on DayCent model <sup>5</sup> results from Pourhashem et al. <sup>2</sup>                                                                                                           |
| <b>Biogenic carbon</b>                       | -10.9                                                                            | -10.9                                                                               | Calculated based on the carbon content of the feedstock                                                                                                                                   |
| <b>Feedstock transport</b>                   | 0.1                                                                              | 0.1                                                                                 | Assuming 80.5 km transportation distance including the return trip and using SimaPro <sup>4</sup> software                                                                                |
| <b>Boiler</b>                                | 3.8                                                                              | 5.4                                                                                 | Boiler emissions due to onsite power production <sup>1-2</sup>                                                                                                                            |
| <b>Pretreatment</b>                          | 0.3                                                                              | 0.2                                                                                 | Data from the literature <sup>2, 6</sup> are used for the LCI model in SimaPro <sup>4</sup> software                                                                                      |
| <b>Chemicals</b>                             | 0.3                                                                              | 0.3                                                                                 | Using Aspen simulation <sup>1, 7</sup> to find required amount of chemicals and finding GWP of required chemicals using SimaPro <sup>4</sup> software                                     |
| <b>Direct CO<sub>2</sub> of fermentation</b> | 2.3                                                                              | 2.3                                                                                 | Based on stoichiometry of Equation 1                                                                                                                                                      |
| <b>Electricity (credit)</b>                  | -1.7                                                                             | -1                                                                                  | Finding required electricity of our modeled bioplant based on Aspen simulation <sup>1, 7</sup> results and using GREET <sup>8</sup> for GWP of extra electricity credit                   |
| <b>Net</b>                                   | -3.4                                                                             | -3.4                                                                                |                                                                                                                                                                                           |

**Table S4.** Life cycle inventory input data for corn stover based polyisoprene (per 1 kg polyisoprene)

| Item                             | Amount                       | Unit               | Source and assumptions                                                                                                                                                                        |
|----------------------------------|------------------------------|--------------------|-----------------------------------------------------------------------------------------------------------------------------------------------------------------------------------------------|
| <i>Upstream</i>                  |                              |                    | Emissions due to corn stover harvest and replacement of nutrients are allocated to the corn stover and emissions from nutrient inputs for crop production are allocated to the corn crop      |
| Feedstock input                  | 6.6                          | kg                 | Calculated based on our model and conversions of different stages                                                                                                                             |
| Feedstock yield                  | 9.7                          | ton/ha/yr          | Spatari et al. <sup>9</sup>                                                                                                                                                                   |
| Collection                       | 1.7                          | MJ                 | Using data from Spatari et al. <sup>9</sup> and Pourhashem et al. <sup>2</sup>                                                                                                                |
| Nutrient replacement             | N 33<br>P 11.9<br>K 60.7     | g                  | Based on GREET <sup>8</sup> results from Spatari et al. <sup>9</sup> for nutrient replacement due to corn stover removal                                                                      |
| N <sub>2</sub> O emissions       | Direct: 0.3<br>Indirect: 0.4 | g                  | Based on DayCent model <sup>5</sup> results from Adler et al. <sup>10</sup> and Pourhashem et al. <sup>2</sup> where results are updated to IPCC Fifth Assessment Report (AR5)                |
| Change in soil carbon            | 1.2                          | kg CO <sub>2</sub> | Based on DayCent model results from Adler et al. <sup>10</sup> and Pourhashem et al. <sup>2</sup>                                                                                             |
| Diesel for transportation        | 30.7                         | ml                 | Assuming 80.5 km transportation distance including the return trip and using diesel powered truck from the USLCI <sup>11</sup> database in SimaPro <sup>4</sup> software                      |
| <i>Biorefinery</i>               |                              |                    | Calculated required amount of energy and chemicals using Aspen Plus <sup>1</sup> simulation and using Ecoinvent <sup>12-13</sup> database for life cycle impact assessment                    |
| Fermentation energy              | 898.9                        | KJ                 |                                                                                                                                                                                               |
| Separation cooling energy        | -1938.8                      | KJ                 |                                                                                                                                                                                               |
| Separation heating energy        | 2068.9                       | KJ                 |                                                                                                                                                                                               |
| Dehydrogenation energy           | 41.9                         | KJ                 |                                                                                                                                                                                               |
| Polymerization cooling energy    | 36                           | KJ                 |                                                                                                                                                                                               |
| Polymerization activation energy | 202.7                        | KJ                 |                                                                                                                                                                                               |
| Surplus electricity              | 8742                         | KJ                 | Difference between the total electricity generated onsite from lignin combustion in the boiler and the electricity required by the bioplant; assumed to replace from the MRO electricity grid |
| Benzene                          | 0.05                         | kg                 |                                                                                                                                                                                               |
| Chlorobenzene                    | 9.8                          | kg                 |                                                                                                                                                                                               |
| H <sub>2</sub> SO <sub>4</sub>   | 0.2                          | kg                 |                                                                                                                                                                                               |
| Ca(OH) <sub>2</sub>              | 0.2                          | kg                 |                                                                                                                                                                                               |
| NH <sub>3</sub>                  | 0.3                          | kg                 |                                                                                                                                                                                               |

**Table S5.** Life cycle inventory input data for forest residue based polyisoprene (per 1 kg polyisoprene)

| Item                             | Amount  | Unit   | Source and assumptions                                                                                                                                                                  |
|----------------------------------|---------|--------|-----------------------------------------------------------------------------------------------------------------------------------------------------------------------------------------|
| <i>Upstream</i>                  |         |        | Calculated required upstream energy using data from Keedy et al. <sup>3</sup> and Ecoinvent <sup>12-13</sup> database for life cycle impact assessment                                  |
| Feedstock input                  | 5.8     | kg     | Calculated based on our model and conversions of different stages                                                                                                                       |
| Feedstock yield                  | 10      | ton/ac | Based on Leinonet <sup>14</sup>                                                                                                                                                         |
| Diesel for feller-buncher        | 6.7     | g      |                                                                                                                                                                                         |
| Diesel for grapple-skidder       | 11.2    | g      |                                                                                                                                                                                         |
| Diesel for chipper               | 6       | g      |                                                                                                                                                                                         |
| Diesel for unloading             | 0.2     | g      |                                                                                                                                                                                         |
| Electricity for mill             | 0.5     | kWh    |                                                                                                                                                                                         |
| Electricity for conveyor         | 0.1     | kWh    |                                                                                                                                                                                         |
| Electricity for baghouse         | 0.1     | kWh    |                                                                                                                                                                                         |
| Electricity for storage          | 27.7    | Wh     |                                                                                                                                                                                         |
| Diesel for transportation        | 27      | ml     | Assuming 80.5 km transportation distance including the return trip and using diesel powered truck of USLCT <sup>11</sup> database in SimaPro <sup>4</sup> software                      |
| <i>Biorefinery</i>               |         |        | Calculated required amount of energy and chemicals using Aspen Plus <sup>1</sup> simulation and using Ecoinvent <sup>12-13</sup> database for life cycle impact assessment              |
| Benzene                          | 0.05    | kg     |                                                                                                                                                                                         |
| Chlorobenzene                    | 9.8     | kg     |                                                                                                                                                                                         |
| H <sub>2</sub> SO <sub>4</sub>   | 0.1     | kg     |                                                                                                                                                                                         |
| Ca(OH) <sub>2</sub>              | 0.2     | kg     |                                                                                                                                                                                         |
| NH <sub>3</sub>                  | 0.3     | kg     |                                                                                                                                                                                         |
| Fermentation energy              | 898.9   | KJ     |                                                                                                                                                                                         |
| Separation cooling energy        | -1938.8 | KJ     |                                                                                                                                                                                         |
| Separation heating energy        | 2068.9  | KJ     |                                                                                                                                                                                         |
| Dehydrogenation energy           | 41.9    | KJ     |                                                                                                                                                                                         |
| Polymerization cooling energy    | 36      | KJ     |                                                                                                                                                                                         |
| Polymerization activation energy | 202.7   | KJ     |                                                                                                                                                                                         |
| Surplus electricity              | 12905   | KJ     | Difference between the total electricity generated onsite from lignin combustion in the boiler and the electricity required from the bioplant; assumed to replace NPCC electricity grid |

Table S3 gives an accounting of carbon balance in terms of CO<sub>2</sub> emissions. We also added Table S6 showing biogenic carbon due to carbon content of the feedstock, boiler and fermentation emissions (sending part of biogenic carbon back to the atmosphere), and remained carbon is embedded in the polymer.

**Table S6.** Carbon balance of the system: partitioning (mass basis) of biogenic carbon in products (polyisoprene), fermentation, and boiler usage

| <b>Carbon source</b>                         | <b>Corn stover (%)</b> | <b>Forest residue (%)</b> | <b>Model source and assumptions</b>                            |
|----------------------------------------------|------------------------|---------------------------|----------------------------------------------------------------|
| <b>Biogenic carbon</b>                       | -100                   | -100                      | Calculated based on the carbon content of the feedstock        |
| <b>Boiler</b>                                | 34.9                   | 49.5                      | Boiler emissions due to onsite power production <sup>1-2</sup> |
| <b>Direct CO<sub>2</sub> of fermentation</b> | 21.1                   | 21.1                      | Based on stoichiometry of Equation 1                           |
| <b>Embedded in polyisoprene</b>              | 44                     | 29.4                      | Remained biogenic carbon                                       |

## References

1. *Aspen Plus V8.8*, Aspen Technology Inc.: Massachusetts.
2. Pourhashem, G.; Adler, P. R.; McAloon, A.; Spatari, S., Cost and greenhouse gas emission tradeoffs of alternative uses of lignin for second generation ethanol. *Environmental Research Letters* 2013, 8 (2), 025021, DOI: 10.1088/1748-9326/8/2/025021.
3. Keedy, J.; Prymak, E.; Macken, N.; Pourhashem, G.; Spatari, S.; Mullen, C. A.; Boateng, A. A., Exergy Based Assessment of the Production and Conversion of Switchgrass, Equine Waste, and Forest Residue to Bio-Oil Using Fast Pyrolysis. *Industrial & Engineering Chemistry Research* **2015**, 54 (1), 529-539, DOI: 10.1021/ie5035682.
4. *SimaPro, Vesion 8.5.2*; PRéConsultants: Amersfoort, The Netherlands.
5. Del Grosso, S. j.; Parton, W. J.; Mosier, A. R.; Hartman, M.; Brenner, J.; Ojima, D. S.; Schimel, D., Simulated Interaction of Carbon Dynamics and Nitrogen Trace Gas Fluxes Using the DAYCENT Model, **2001**; p 303-332, DOI: 10.1201/9781420032635.ch8.
6. Spatari, S.; MacLean, H. L., Characterizing Model Uncertainties in the Life Cycle of Lignocellulose-Based Ethanol Fuels. *Environmental Science & Technology* **2010**, 44 (22), 8773-8780, DOI: 10.1021/es102091a.
7. *Aspen HYSYS v8.6*, Aspen Technology Inc.: Massachusetts.
8. Wang, M.; *GREET 2017*, Argonne National Laboratory: Argonne, Illinois, USA.
9. Spatari, S.; Bagley, D. M.; MacLean, H. L., Life cycle evaluation of emerging lignocellulosic ethanol conversion technologies. *Bioresour. Technol.* **2010**, 101 (2), 654.
10. Adler, P. R.; Mitchell, J. G.; Pourhashem, G.; Spatari, S.; Del Grosso, S. J.; Parton, W. J., Integrating biorefinery and farm biogeochemical cycles offsets fossil energy and mitigates soil carbon losses. *Ecological Applications* **2015**, 25 (4), 1142-1156.

11. U.S. Life Cycle Inventory Database." (2012). National Renewable Energy Laboratory, 2012.
12. Ecoinvent; Swiss Center for Life Cycle Inventories: Duebendorf, Switzerland, 2009.
13. Wernet, G.; Bauer, C.; Steubing, B.; Reinhard, J.; Moreno-Ruiz, E.; Weidema, B., The ecoinvent database version 3 (part I): overview and methodology. *Int. J. Life Cycle Assess.* **2016**, *21* (9), 1218.
14. Leinonen, A., Harvesting Technology of Forest residues for fuel in the USA and Finland. *VTT Tiedotteita - Valtion Teknillinen Tutkimuskeskus* **2004**.
